# Supplementary material
Source: ML conference proceedings conference paper supplement (https://proceedings.neurips.cc/paper_files/paper/2017/hash/18bb68e2b38e4a8ce7cf4f6b2625768c-Abstract.html)
Supplement: Supplementary file [file 18bb68e2b38e4a8ce7cf4f6b2625768c-Supplemental.zip]

## A Partition Function

We recall two easily verified facts about determinants that will be useful in our analysis:

$$\det(K + uv^\top) = \det(K)(1 + u^\top K^{-1}v), \quad \text{for } K \in \text{GL}_n(\mathbb{R}), \quad (\text{A.1})$$

$$a^{m-n} \det(AA^\top + aI_n) = \det(A^\top A + aI_m), \quad \text{for } A \in \mathbb{R}^{n \times m} (n \leq m), \text{ and } a > 0. \quad (\text{A.2})$$

The first one is known as matrix determinant lemma.

The partition function of  $P(\cdot; A)$ , happens to have a pleasant closed-form formula. Although this formula is known [6], and follows immediately by an application of the Cauchy-Binet identity, we present an alternative proof based on the perturbation argument for its conceptual value and subsequent use.

**Theorem 11** (Partition Function [6]). *Given  $A \in \mathbb{R}^{n \times m}$  where  $r(A) = n$  and  $n \leq |S| = k \leq m$ , we have*

$$\sum_{|S|=k, S \subseteq [m]} \det(A_S A_S^\top) = \binom{m-n}{k-n} \det(AA^\top). \quad (\text{A.3})$$

*Proof.* First note that for  $n \leq |S| = k \leq m$  and any  $\varepsilon > 0$ , by (A.2) we have

$$\det(A_S A_S^\top + \varepsilon I_n) = \frac{1}{\varepsilon^{k-n}} \det(A_S^\top A_S + \varepsilon I_k)$$

Taking limits as  $\varepsilon \rightarrow 0$  on both sides we have

$$\det(A_S A_S^\top) = \lim_{\varepsilon \rightarrow 0} \det(A_S A_S^\top + \varepsilon I_n) = \lim_{\varepsilon \rightarrow 0} \frac{1}{\varepsilon^{k-n}} \det(A_S^\top A_S + \varepsilon I_k).$$

Let us focus on  $\det(A_S^\top A_S + \varepsilon I_k)$ . We construct an identity matrix  $I_m \in \mathbb{R}^{m \times m}$ , then we have

$$\begin{aligned} \det(A_S^\top A_S + \varepsilon I_k) &= \det(A_S^\top A_S + \varepsilon I_S^\top I_S) = \det(A_S^\top A_S + (\sqrt{\varepsilon} I_S)^\top \sqrt{\varepsilon} I_S) \\ &= \det \left( \begin{bmatrix} A_S \\ \sqrt{\varepsilon} (I_m)_S \end{bmatrix}^\top \begin{bmatrix} A_S \\ \sqrt{\varepsilon} (I_m)_S \end{bmatrix} \right) \propto \hat{P} \left( S; \begin{bmatrix} A \\ \sqrt{\varepsilon} I_m \end{bmatrix} \right). \end{aligned} \quad (\text{A.4})$$

In other words, this value is proportional to the probability of sampling columns from  $\begin{bmatrix} A \\ \sqrt{\varepsilon} I_m \end{bmatrix}$  using volume sampling. Therefore, using the definition of  $e_k$  we have

$$\begin{aligned} \frac{1}{\varepsilon^{k-n}} \sum_{|S|=k, S \subseteq [m]} \det(A_S^\top A_S + \varepsilon I_k) &= \frac{1}{\varepsilon^{k-n}} e_k(A^\top A + \varepsilon I_m) \\ &= \frac{1}{\varepsilon^{k-n}} e_k(\text{Diag}((\sigma_1^2(A) + \varepsilon), (\sigma_2^2(A) + \varepsilon), \dots, (\sigma_n^2(A) + \varepsilon), \varepsilon, \dots, \varepsilon))) \\ &= \binom{m-n}{k-n} \prod_{i=1}^n (\sigma_i^2(A) + \varepsilon) + O(\varepsilon). \end{aligned}$$

Now taking the limit as  $\varepsilon \rightarrow 0$  we obtain

$$\sum_{|S|=k, S \subseteq [m]} \det(A_S A_S^\top) = \lim_{\varepsilon \rightarrow 0} \binom{m-n}{k-n} \prod_{i=1}^n (\sigma_i^2(A) + \varepsilon) + O(\varepsilon) = \binom{m-n}{k-n} \det(AA^\top).$$

□

## B Marginal Probability

*Proof.* The marginal probability of a set  $T \subseteq [m]$  for dual volume sampling is

$$P(T \subseteq S; A) = \frac{\sum_{S \supseteq T, |S|=k} \det(A_S A_S^\top)}{\sum_{|S'|=k} \det(A_{S'} A_{S'}^\top)}.$$

Theorem 11 shows how to compute the denominator, thus our main effort is devoted to the nominator. We have

$$\sum_{S \supseteq T, |S|=k} \det(A_S A_S^\top) = \sum_{R \cap T = \emptyset, |R|=k-|T|} \det(A_{T \cup R} A_{T \cup R}^\top)$$

Using the  $\varepsilon$ -trick we have

$$\begin{aligned} \sum_{R \cap T = \emptyset, |R|=k-|T|} \det(A_{T \cup R} A_{T \cup R}^\top) &= \lim_{\varepsilon \rightarrow 0} \sum_{R \cap T = \emptyset, |R|=k-|T|} \det(A_{T \cup R} A_{T \cup R}^\top + \varepsilon I_n) \\ &= \lim_{\varepsilon \rightarrow 0} \frac{1}{\varepsilon^{k-n}} \sum_{R \cap T = \emptyset, |R|=k-|T|} \det(A_{T \cup R}^\top A_{T \cup R} + \varepsilon I_k). \end{aligned}$$

By decomposing  $\det(A_{T \cup R}^\top A_{T \cup R} + \varepsilon I_k)$  we have

$$\begin{aligned} \det(A_{T \cup R}^\top A_{T \cup R} + \varepsilon I_k) \\ = \det(A_T^\top A_T + \varepsilon I_{|T|}) \det(A_R^\top A_R + \varepsilon I_{|R|} - A_R^\top A_T (A_T^\top A_T + \varepsilon I_{|T|})^{-1} A_T^\top A_R). \end{aligned}$$

Now we let  $A_T = Q_T \Sigma_T V_T^\top$  be the singular value decomposition of  $A_T$  where  $Q_T \in \mathbb{R}^{n \times r(A_T)}$ ,  $\Sigma_T \in \mathbb{R}^{r(A_T) \times |T|}$  and  $V_T \in \mathbb{R}^{|T| \times |T|}$ . Plugging the decomposition in the equation we obtain

$$\begin{aligned} A_R^\top A_T (A_T^\top A_T + \varepsilon I_{|T|})^{-1} A_T^\top A_R &= A_R^\top Q_T \Sigma_T V_T^\top (V_T \Sigma_T^\top \Sigma_T V_T^\top + \varepsilon I_{|T|})^{-1} V_T \Sigma_T^\top Q_T^\top A_R \\ &= A_R^\top Q_T \Sigma_T (\Sigma_T^\top \Sigma_T + \varepsilon I_{|T|})^{-1} \Sigma_T^\top Q_T^\top A_R \\ &= A_R^\top Q_T \begin{bmatrix} \frac{\sigma_1^2(A_T)}{\sigma_1^2(A_T) + \varepsilon} & 0 & \dots & 0 \\ 0 & \frac{\sigma_2^2(A_T)}{\sigma_2^2(A_T) + \varepsilon} & \dots & 0 \\ \vdots & \vdots & \ddots & \vdots \\ 0 & 0 & \dots & \frac{\sigma_{r(A_T)}^2(A_T)}{\sigma_{r(A_T)}^2(A_T) + \varepsilon} \end{bmatrix} Q_T^\top A_R \\ &= A_R^\top Q_T Q_T^\top A_R - \varepsilon A_R^\top Q_T \begin{bmatrix} \frac{1}{\sigma_1^2(A_T) + \varepsilon} & 0 & \dots & 0 \\ 0 & \frac{1}{\sigma_2^2(A_T) + \varepsilon} & \dots & 0 \\ \vdots & \vdots & \ddots & \vdots \\ 0 & 0 & \dots & \frac{1}{\sigma_{r(A_T)}^2(A_T) + \varepsilon} \end{bmatrix} Q_T^\top A_R. \end{aligned}$$

Thus it follows that

$$\begin{aligned} A_R^\top A_R + \varepsilon I_{|R|} - A_R^\top A_T (A_T^\top A_T + \varepsilon I_{|T|})^{-1} A_T^\top A_R \\ = A_R^\top (I - Q_T Q_T^\top) A_R + \varepsilon A_R^\top Q_T \begin{bmatrix} \frac{1}{\sigma_1^2(A_T) + \varepsilon} & 0 & \dots \\ 0 & \frac{1}{\sigma_2^2(A_T) + \varepsilon} & \dots \\ \vdots & \vdots & \ddots \end{bmatrix} Q_T^\top A_R + \varepsilon I_{|R|} \\ = B_R^\top B_R + \varepsilon C_R^\top C_R + \varepsilon I_{|R|}, \end{aligned}$$

where  $B_R$  is the projection of columns of  $A_R$  on the orthogonal space of columns of  $A_T$ . Let  $Q_T^\perp \in \mathbb{R}^{n \times (n-r(A_T))}$  be the complement column space of  $Q_T$ , then we have  $B_R = (Q_T^\perp)^\top A_R \in \mathbb{R}^{(n-r(A_T)) \times |R|}$ . Moreover,

$$C_R = \begin{bmatrix} \frac{1}{\sqrt{\sigma_1^2(A_T) + \varepsilon}} & 0 & \dots \\ 0 & \frac{1}{\sqrt{\sigma_2^2(A_T) + \varepsilon}} & \dots \\ \vdots & \vdots & \ddots \end{bmatrix} Q_T^\top A_R \in \mathbb{R}^{r(A_T) \times |R|}.$$

We further let  $B_{T_c} = (Q_T^\perp)^\top A_{T_c} \in \mathbb{R}^{(n-r(A_T)) \times (m-|T|)}$  and

$$C_{T_c} = \begin{bmatrix} \frac{1}{\sqrt{\sigma_1^2(A_T) + \varepsilon}} & 0 & \dots \\ 0 & \frac{1}{\sqrt{\sigma_2^2(A_T) + \varepsilon}} & \dots \\ \vdots & \vdots & \ddots \end{bmatrix} Q_T^\top A_{T_c} \in \mathbb{R}^{r(A_T) \times (m-|T|)}$$

where  $T_c = [m] \setminus T$ . Then we have

$$\begin{aligned}
& \sum_{R \cap T = \emptyset, |R| = k - |T|} \det(A_{T \cup R}^\top A_{T \cup R} + \varepsilon I_k) \\
&= \det(A_T^\top A_T + \varepsilon I_{|T|}) \sum_{R \cap T = \emptyset, |R| = k - |T|} \det(B_R^\top B_R + \varepsilon C_R^\top C_R + \varepsilon I_{|R|}) \\
&= \det(A_T^\top A_T + \varepsilon I_{|T|}) \times e_{k - |T|} \left( \begin{bmatrix} B_{T_c} \\ \sqrt{\varepsilon} U_{T_c} \\ \sqrt{\varepsilon} C_{T_c} \end{bmatrix} \begin{bmatrix} B_{T_c} \\ \sqrt{\varepsilon} U_{T_c} \\ \sqrt{\varepsilon} C_{T_c} \end{bmatrix}^\top \right)
\end{aligned}$$

where we construct an orthonormal matrix  $U \in \mathbb{R}^{(m - |T|) \times (m - |T|)}$  whose columns are basis vectors. Since we are free to choose any orthonormal  $U$ , we simply let it be  $I$ . Let  $W_{T_c} = \begin{bmatrix} I_{T_c} \\ C_{T_c} \end{bmatrix}$ , we have

$$\begin{aligned}
& \left( \begin{bmatrix} B_{T_c} \\ \sqrt{\varepsilon} U_{T_c} \\ \sqrt{\varepsilon} C_{T_c} \end{bmatrix} \begin{bmatrix} B_{T_c} \\ \sqrt{\varepsilon} U_{T_c} \\ \sqrt{\varepsilon} C_{T_c} \end{bmatrix}^\top \right) = \left( \begin{bmatrix} B_{T_c} \\ \sqrt{\varepsilon} W_{T_c} \end{bmatrix} \begin{bmatrix} B_{T_c} \\ \sqrt{\varepsilon} W_{T_c} \end{bmatrix}^\top \right) \\
&= F_{T_c} \in \mathbb{R}^{(m + n - |T|) \times (m + n - |T|)}
\end{aligned}$$

The properties of characteristic polynomials imply that

$$\begin{aligned}
e_{k - |T|}(F_{T_c}) &= \sum_{|S| = k - |T|} \det((F_{T_c})_{S, S}) \\
&= \sum_{S_1, S_2} \det((F_{T_c})_{S_1, S_1}) \det((F_{T_c})_{S_2, S_2} - (F_{T_c})_{S_2, S_1} (F_{T_c})_{S_1, S_1}^{-1} (F_{T_c})_{S_1, S_2})
\end{aligned}$$

where  $S_1 = S \cap [r(B_{T_c})]$  and  $S_2 = [m + n - |T|] \setminus S_1$ . Further we have

$$\begin{aligned}
& \sum_{S_1, S_2} \det((F_{T_c})_{S_1, S_1}) \det((F_{T_c})_{S_2, S_2} - (F_{T_c})_{S_2, S_1} (F_{T_c})_{S_1, S_1}^{-1} (F_{T_c})_{S_1, S_2}) \\
&= \sum_{S_1, S_2} \varepsilon^{k - |T| - |S_1|} \det((B_{T_c})_{S_1} (B_{T_c})_{S_1}^\top) \times \\
&\quad \det((W_{T_c})_{S_2} (W_{T_c})_{S_2}^\top - (W_{T_c})_{S_2} (B_{T_c})_{S_1}^\top ((B_{T_c})_{S_1} (B_{T_c})_{S_1}^\top)^{-1} (B_{T_c})_{S_1} (W_{T_c})_{S_2}^\top)
\end{aligned}$$

Hence it follows that

$$\lim_{\varepsilon \rightarrow 0} \frac{1}{\varepsilon^{k - n}} \sum_{R \cap T = \emptyset, |R| = k - |T|} \det(A_{T \cup R}^\top A_{T \cup R} + \varepsilon I_k) = \lim_{\varepsilon \rightarrow 0} \frac{1}{\varepsilon^{k - n}} \det(A_T^\top A_T + \varepsilon I_{|T|}) \times e_{k - |T|}(F_{T_c})$$

$$= \lim_{\varepsilon \rightarrow 0} \frac{1}{\varepsilon^{k - n}} \varepsilon^{|T| - r(A_T)} \left[ \prod_{i=1}^{r(A_T)} (\sigma_i^2(A_T) + \varepsilon) \right] \times$$

$$\sum_{|S| = k - |T|} \varepsilon^{k - |T| - |S_1|} \det((B_{T_c})_{S_1} (B_{T_c})_{S_1}^\top) \times$$

$$\det((W_{T_c})_{S_2} (W_{T_c})_{S_2}^\top - (W_{T_c})_{S_2} (B_{T_c})_{S_1}^\top ((B_{T_c})_{S_1} (B_{T_c})_{S_1}^\top)^{-1} (B_{T_c})_{S_1} (W_{T_c})_{S_2}^\top)$$

(Since  $r(A_T) + r(B_{T_c}) = n$  and  $|S_1| \leq r(B_{T_c})$ )

$$\begin{aligned}
&= \lim_{\varepsilon \rightarrow 0} \frac{1}{\varepsilon^{k - n}} \varepsilon^{|T| - r(A_T)} \left[ \prod_{i=1}^{r(A_T)} (\sigma_i^2(A_T) + \varepsilon) \right] \times \\
&\quad \sum_{|S| = k - |T|} \varepsilon^{k - |T| - r(B_{T_c})} \det(B_{T_c} B_{T_c}^\top) \det((W_{T_c})_{S_2} (W_{T_c})_{S_2}^\top - (W_{T_c})_{S_2} B_{T_c}^\top (B_{T_c} B_{T_c}^\top)^{-1} B_{T_c} (W_{T_c})_{S_2}^\top) + O(\varepsilon) \\
&= \left[ \prod_{i=1}^{r(A_T)} \sigma_i^2(A_T) \right] \times \left[ \prod_{j=1}^{r(B_{T_c})} \sigma_j^2(B_{T_c}) \right] \sum_{S_2} \det((W_{T_c})_{S_2} (W_{T_c})_{S_2}^\top - (W_{T_c})_{S_2} B_{T_c}^\top (B_{T_c} B_{T_c}^\top)^{-1} B_{T_c} (W_{T_c})_{S_2}^\top)
\end{aligned}$$

where  $S_2 \subseteq [m+n-|T|] \setminus [r(B_{T_c})]$  and  $|S_2| = k - |T| - r(B_{T_c})$ .

Let  $Q_{B_{T_c}} \text{diag}(\sigma_i^2(B_{T_c}))Q_{B_{T_c}}^\top$  be the eigenvalue decomposition of  $B_{T_c}^\top B_{T_c}$  where  $Q_{B_{T_c}} \in \mathbb{R}^{|T_c| \times r(B_{T_c})}$ . Further, let  $Q_{B_{T_c}}^\perp$  be the complement column space of  $Q_{B_{T_c}}$ , thus we have

$$\begin{bmatrix} Q_{B_{T_c}}^\top \\ (Q_{B_{T_c}}^\perp)^\top \end{bmatrix} \begin{bmatrix} Q_{B_{T_c}} & Q_{B_{T_c}}^\perp \end{bmatrix} = I_{|T_c|} = I_{n-|T|}$$

Then for any  $S_2 \subseteq [m+n-|T|] \setminus [r(B_{T_c})]$  we have

$$\begin{aligned} \det((W_{T_c})_{S_2} (W_{T_c})_{S_2}^\top - (W_{T_c})_{S_2} B_{T_c}^\top (B_{T_c} B_{T_c}^\top)^{-1} B_{T_c} (W_{T_c})_{S_2}^\top) &= \det(W_{S_2} (I_{n-|T|} - Q_{B_{T_c}} Q_{B_{T_c}}^\top) (W_{T_c})_{S_2}^\top) \\ &= \det((W_{T_c})_{S_2} (Q_{B_{T_c}}^\perp (Q_{B_{T_c}}^\perp)^\top) (W_{T_c})_{S_2}^\top) \end{aligned}$$

It follows that

$$\begin{aligned} \sum_{S_2} \det(W_{S_2} (W_{T_c})_{S_2}^\top - (W_{T_c})_{S_2} B_{T_c}^\top (B_{T_c} B_{T_c}^\top)^{-1} B_{T_c} (W_{T_c})_{S_2}^\top) &= e_{k-|T|-r(B_{T_c})} (W_{T_c} ((Q_{B_{T_c}}^\perp)^\top Q_{B_{T_c}}^\perp) W_{T_c}^\top) \\ &= E_T \end{aligned}$$

Combining all the above derivations, we obtain that

$$\Pr(T \subseteq S | S \sim P(S; A)) = \frac{\left[ \prod_{i=1}^{r(A_T)} \sigma_i^2(A_T) \right] \times \left[ \prod_{j=1}^{r(B_{T_c})} \sigma_j^2(B_{T_c}) \right] \times \Gamma_T}{\binom{n-m}{k-m} \det(AA^\top)}.$$

□

## C Approximate Sampling via Volume Sampling

**Corollary 12** (Approximate DVS via Random Projection). *For any  $\varepsilon > 0$  and  $\delta_2 > 0$  there is an algorithm that, in time  $\tilde{O}(\frac{k^2 nm}{\delta_2^2} + \frac{k^7 m}{\delta_2^6})$ , samples a subset from an approximate distribution  $\tilde{P}(\cdot; A)$  with  $\delta_1 = \max_{|S|=k} (1 + \frac{\varepsilon}{\sigma_{\min}^2(A_S)})^n - 1 \approx \frac{n\varepsilon}{\sigma_{\min}^2(A_S)}$  and*

$$\frac{\tilde{P}(S; A)}{(1 + \delta_1)(1 + \delta_2)} \leq P(S; A) \leq (1 + \delta_1)(1 + \delta_2) \tilde{P}(S; A); \quad \forall S \subseteq [m].$$

It may happen in practice that  $n \ll m$  but  $k$  is of the same order as  $n$ . In such case we can transform the dual volume sampling to slightly distorted volume sampling based on (A.2) and then take the advantage of determinant-preserving projections to accelerate the sampling procedure.

Concretely, instead of sampling column subset  $S$  with probability proportional to  $\det(A_S A_S^\top)$ , we sample with probability proportional to a distorted value  $\det(A_S A_S^\top + \varepsilon I_n)$  for small  $\varepsilon > 0$ . Denoting this distorted distribution as  $P_\varepsilon(S; A)$ , we have

$$P_\varepsilon(S; A) = \frac{1}{\varepsilon^{k-n}} \det(A_S^\top A_S + \varepsilon I_k) = \frac{1}{\varepsilon^{k-n}} \prod_{i=1}^n (\sigma_i^2(A_S) + \varepsilon).$$

Letting  $\sigma_{\min}(A_S) > 0$  be the minimum singular value, we have

$$1 \leq \frac{\prod_{i=1}^n (\sigma_i^2(A_S) + \varepsilon)}{\prod_{i=1}^n (\sigma_i^2(A_S))} \leq (1 + \frac{\varepsilon}{\sigma_{\min}^2(A_S)})^n.$$

We further let

$$\delta_1 = \max_{|S|=k} (1 + \frac{\varepsilon}{\sigma_{\min}^2(A_S)})^n - 1 \approx \frac{n\varepsilon}{\sigma_{\min}^2(A_S)},$$

when  $\varepsilon$  sufficiently small. Sampling from  $P_\varepsilon$  will yield  $(1 + \delta_1)$ -approximate dual volume sampling (in the sense of [17] and our Theorem 12). We can sample from  $P_\varepsilon$  via *volume sampling* with distribution  $\hat{P}(S; \begin{bmatrix} A \\ \sqrt{\varepsilon} I_m \end{bmatrix})$ . With the volume sampling algorithm proposed in [17], the resulting running time would be  $\tilde{O}(km^4)$ .

To accelerate sampling procedure, we consider random projection techniques that preserve volumes. [32] showed that Gaussian random projections indeed preserve volumes as we need:

**Theorem 13** (Random Projection [32]). *For any  $X \in \mathbb{R}^{n \times m}$ ,  $1 \leq k \leq m$  and  $0 < \delta_2 \leq 1/2$ , the random Gaussian projection of  $\mathbb{R}^m \rightarrow \mathbb{R}^d$  where*

$$d = \mathcal{O}\left(\frac{k^2 \log n}{\delta_2^2}\right),$$

*satisfies*

$$\det(X_S^\top X_S) \leq \det(\tilde{X}_S^\top \tilde{X}_S) \leq (1 + \delta_2) \det(X_S^\top X_S) \quad (\text{C.1})$$

*for all  $S \subseteq [n]$  and  $|S| \leq k$  where  $\tilde{X}$  is the projected matrix.*

This theorem completes what we need to prove Corollary 12.

*Proof.* (Corollary 12) The idea is to project  $\begin{bmatrix} A \\ \sqrt{\varepsilon} I_m \end{bmatrix}$  to a lower-dimensional space in a way that the values for submatrix determinants are preserved up to a small multiplicative factor. Then we perform volume sampling. We project columns of  $\begin{bmatrix} A \\ \sqrt{\varepsilon} I_m \end{bmatrix}$ , which is in  $\mathbb{R}^{m+n}$ , to vectors in  $\mathbb{R}^d$  where  $d = \mathcal{O}\left(\frac{k^2 \log m}{\delta_2^2}\right)$  so as to achieve a  $(1 + \delta_2)$  approximation by Theorem 13. Let  $G$  be a  $d \times (m + n)$ -dimensional i.i.d. Gaussian random matrix, then we have

$$G \begin{bmatrix} A \\ \sqrt{\varepsilon} I \end{bmatrix} = G_A A + \sqrt{\varepsilon} G'_A \quad (\text{C.2})$$

where  $G_A \in \mathbb{R}^{d \times n}$  and  $G'_A \in \mathbb{R}^{d \times m}$  are two independent Gaussian random matrix. The projected matrix can be computed in  $\mathcal{O}(dnm) = \tilde{\mathcal{O}}(k^2 n m n / \delta_2^2)$  time. After that, if we use volume sampling algorithm proposed in [17] the resulting running time would be  $\mathcal{O}(kd^3 m) = \tilde{\mathcal{O}}(k^7 m / \delta_2^6)$ . Thus the total running time would be  $\tilde{\mathcal{O}}(\frac{k^2 n m}{\delta_2^2} + \frac{k^7 m}{\delta_2^6})$ .  $\square$

**Remarks.** An interesting observation is that the resulting running time is independent of  $\delta_1$ , which means one can set  $\varepsilon$  arbitrarily small so as to make the approximation in the first step as accurate as possible, without affecting the running time. However, in practice, a very small  $\varepsilon$  can result in numerical problems. In addition, the dimensionality reduction is only efficient if  $d < m + n$ .

## D Conditional Expectation

*Proof.* We use  $A^j$  denote the matrix  $A_{[n] \setminus \{j\}, :}$ , namely matrix  $A$  with row  $j$  deleted. We have

$$\begin{aligned} & \mathbb{E} \left[ \|A_S^\dagger\|_F^2 \mid s_1 = i_1, \dots, s_{t-1} = i_{t-1} \right] \\ &= \sum_{(i_t, \dots, i_k) \in [m]^{k-t+1}} \|A_S^\dagger\|_F^2 \vec{P}(s_1 = i_1, \dots, s_k = i_k; A \mid s_1 = i_1, \dots, s_{t-1} = i_{t-1}) \\ &= \sum_{(i_t, \dots, i_k) \in [m]^{k-t+1}} \|A_S^\dagger\|_F^2 \frac{\vec{P}(s_1 = i_1, \dots, s_k = i_k; A)}{\vec{P}(s_1 = i_1, \dots, s_{t-1} = i_{t-1}; A)} \\ &= \frac{\sum_{(i_t, \dots, i_k) \in [m]^{k-t+1}} \det(A_{\{i_1, \dots, i_k\}} A_{\{i_1, \dots, i_k\}}^\top) \|A_{\{i_1, \dots, i_k\}}^\dagger\|_F^2}{\sum_{(i_t, \dots, i_k) \in [m]^{k-t+1}} \det(A_{\{i_1, \dots, i_k\}} A_{\{i_1, \dots, i_k\}}^\top)} \\ &= \frac{\sum_{j=1}^n \sum_{(i_t, \dots, i_k) \in [m]^{k-t+1}} \det(A_{\{i_1, \dots, i_k\}}^j (A_{\{i_1, \dots, i_k\}}^j)^\top)}{\sum_{(i_t, \dots, i_k) \in [m]^{k-t+1}} \det(A_{\{i_1, \dots, i_k\}} A_{\{i_1, \dots, i_k\}}^\top)} \end{aligned}$$

While the denominator is the (unnormalized) marginal distribution  $P(T \subseteq S \mid S \sim P(S; A))$ , the numerator is the summation of (unnormalized) marginal distribution  $P(T \subseteq S \mid S \sim P(S; A^j))$  for  $j = 1, \dots, n$ . By Theorem 2 we can compute this expectation in  $\mathcal{O}(nm^3)$  time.  $\square$

---

**Algorithm 2** Derandomized Dual Volume Sampling for Column Subset Selection.

---

**Input:** Matrix  $A \in \mathbb{R}^{n \times m}$  to sample columns from,  $m \leq k \leq n$  the target size

**Output:** Set  $S$  such that  $|S| = k$  with the guarantee

$$\|A_S^\dagger\|_F^2 \leq \frac{m-n+1}{k-n+1} \|A^\dagger\|_F^2; \quad \|A_S^\dagger\|_2^2 \leq \frac{n(m-n+1)}{k-n+1} \|A^\dagger\|_2^2$$

Initialize  $\vec{S}$  as empty tuple

**for**  $i = 1$  to  $k$  **do**

**for**  $j \notin \vec{S}$  **do**

        Compute conditional expectation  $E_j = \mathbb{E} \left[ \|A_T^\dagger\|_F^2 \mid t_1 = s_1, \dots, t_{i-1} = s_{i-1}, t_i = j \right]$  with Corollary 4.

**end for**

    Choose  $j = \arg \min_{j \notin \vec{S}} E_j$

$\vec{S} = \vec{S} \circ j$

**end for**

Output  $\vec{S}$  as a set  $S$

---

## E Greedy Derandomization

**Theorem 14.** Algorithm 2 is a derandomization of dual volume sampling that selects a set  $S$  of columns satisfying

$$\|A_S^\dagger\|_F^2 \leq \frac{m-n+1}{k-n+1} \|A^\dagger\|_F^2; \quad \|A_S^\dagger\|_2^2 \leq \frac{n(m-n+1)}{k-n+1} \|A^\dagger\|_2^2.$$

*Proof.* Observe that at each iteration  $t$ , we have

$$\begin{aligned} & \mathbb{E}[\|A_T^\dagger\|_F^2 \mid t_1 = s_1, \dots, t_{i-1} = s_{i-1}] \\ &= \sum_{j \notin \vec{S}} \vec{P}(t_i = j \mid t_1 = s_1, \dots, t_{i-1} = s_{i-1}) \mathbb{E}[\|A_T^\dagger\|_F^2 \mid t_1 = s_1, \dots, t_{i-1} = s_{i-1}, t_i = j], \end{aligned}$$

and we choose  $j$  such that  $\mathbb{E}[\|A_T^\dagger\|_F^2 \mid t_1 = s_1, \dots, t_{i-1} = s_{i-1}, t_i = j]$  is minimized. Since at the beginning we have

$$\mathbb{E}[\|A_T^\dagger\|_F^2] \leq \frac{m-n+1}{k-n+1} \|A^\dagger\|_F^2; \quad T \sim P(T; A),$$

it follows that the conditional expectation satisfies

$$\mathbb{E}[\|A_T^\dagger\|_F^2 \mid t_1 = s_1, \dots, t_{i-1} = s_{i-1}, t_i = j] \leq \frac{m-n+1}{k-n+1} \|A^\dagger\|_F^2.$$

Hence we have

$$\|A_S^\dagger\|_F^2 = \mathbb{E}[\|A_T^\dagger\|_F^2 \mid t_1 = s_1, \dots, t_{k-1} = s_{k-1}, t_k = s_k] \leq \frac{m-n+1}{k-n+1} \|A^\dagger\|_F^2.$$

Further, by using standard bounds relating the operator norm to the Frobenius norm, we obtain

$$\|A_S^\dagger\|_2^2 \leq \|A_S^\dagger\|_F^2 \leq \frac{m-n+1}{k-n+1} \|A^\dagger\|_F^2 \leq \frac{n(m-n+1)}{k-n+1} \|A^\dagger\|_2^2.$$

□

## F Initialization

Set  $\varepsilon = \min_{|S|=k} \sigma_n^2(A_S) > 0$ , whereby

$$\det(A_S A_S^\top + \varepsilon I_n) = \varepsilon^{n-k} \det(A_S^\top A_S + \varepsilon I_k) \propto \text{VolSmpl}(S; [A^\top \sqrt{\varepsilon} I_m]^\top).$$

The rhs is a distribution induced by volume sampling. Greedily choosing columns of  $A$  one by one gives a  $k!$  approximation to the maximum volume submatrix [15]. This results in a set  $S$  such that

$$\begin{aligned} \det(A_S A_S^\top) &\geq \frac{1}{2^n} \det(A_S A_S^\top + \varepsilon I_n) = \frac{1}{2^{n\varepsilon^{k-n}}} \det(A_S^\top A_S + \varepsilon I_k) \\ &\geq \max_{|S|=k} \frac{1}{2^n k! \varepsilon^{k-n}} \det(A_S^\top A_S + \varepsilon I_k) = \max_{|S|=k} \frac{1}{2^n k!} \det(A_S A_S^\top + \varepsilon I_n) \\ &\geq \frac{1}{2^n k! \binom{m}{k}} \sum_{|S|=k} \det(A_S A_S^\top + \varepsilon I_n) \geq \frac{1}{2^n k! \binom{m}{k}} \sum_{|S|=k} \det(A_S A_S^\top). \end{aligned}$$

Thus,  $\log P(S; A)^{-1} \geq \log(2^n k! \binom{m}{k}) = \mathcal{O}(k \log m)$ . Note that in practice it is hard to set  $\varepsilon$  to be exactly  $\min_{|S|=k} \sigma_n^2(A_S)$ , but a small approximate value suffices.

## G Experiments

We show full results on CompAct(s), CompAct, Abalone and Bank32NH datasets in Figure 2, 3, 4 and 5 respectively. We also run DVS-\*, which is  $\frac{1}{*}$ -generalized DVS algorithm. We observe that decreasing  $\beta$  sometimes helps but sometimes not. In Figure 5 we observe that optimization- or greedy-based methods, while taking a huge amount of time to run, perform better than all sampling-based methods, thus for these selection methods, one is not always superior than another.

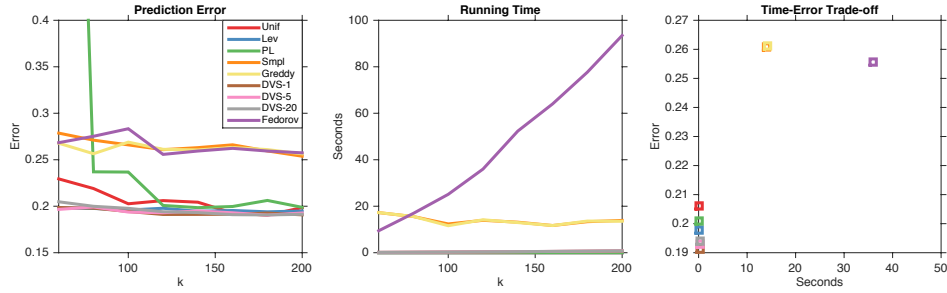

Figure 2: Results on CompAct(s). Note that Unif, Lev, PL and DVS use less than 1 second to finish experiments.

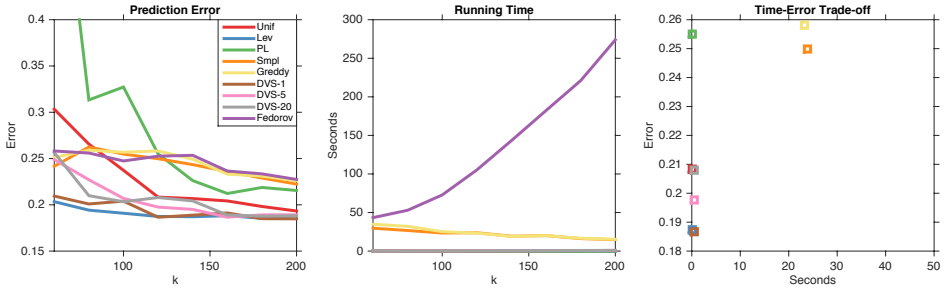

Figure 3: Results on CompAct. Note that Unif, Lev, PL and DVS use less than 1 second to finish experiments.

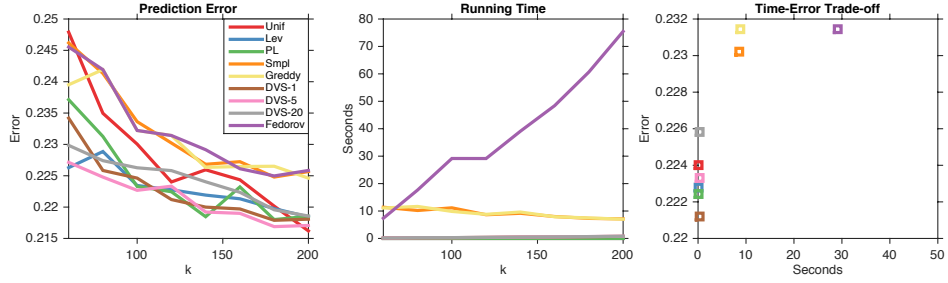

Figure 4: Results on Abalone. Note that Unif, Lev, PL and DVS use less than 1 second to finish experiments.

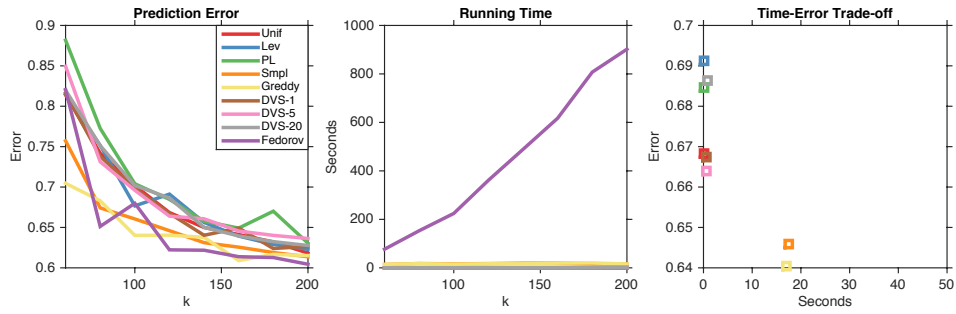

Figure 5: Results on Bank32NH. Note that Unif, Lev, PL and DVS use less than 1 second to finish experiments.
